# Supplementary material for: Enhancement of acidic hydrogen evolution reaction efficiency through Cu/Ni-doped MFI-type protozeolite layered nanoclusters
Source: Royal Society of Chemistry journal article supplement (doi:10.1039/d4ra04475d), 2024-01-01
Supplement: d4ra04475d1.pdf [file d4ra04475d1.pdf]

# Enhancement of Acidic Hydrogen Evolution Reaction Efficiency through Cu/Ni-doped MFI-type Protozeolite Layered Nanoclusters

Xiaodi Zhang<sup>1</sup>, Xiyuan Tong<sup>1#</sup>, Junyang Wang <sup>1#</sup>, Xinyu Zhu<sup>1</sup>, Zhuozhe Li<sup>1</sup>, Fang Fang<sup>1</sup>, Kun Qian<sup>1\*</sup>, Yifeng E<sup>1\*</sup>

1. Jinzhou Medical University, Jinzhou 121001, P. R. China.

Submitted to *RSC Advances* as a full paper

## Corresponding Author:

Dr. Yifeng E

E-mail: eyf@jzmu.edu.cn

Dr. Kun Qian

E-mail: skyeearth20032003@163.com

#Xiyuan Tong and Junyang Wang contributes equal to Xiaodi Zhang for this work

**Table caption**

**Table S1.** Comparison of main element distribution ratio in EDS and XPS.

Table S1. Comparison of main element distribution ratio in EDS and XPS.

| Element                       | Cu    | Ni    | Na    | Al    | Si     |
|-------------------------------|-------|-------|-------|-------|--------|
| <b>Method</b>                 |       |       |       |       |        |
| EDS (before electroreduction) | 0.74% | 1.47% | 0.1%  | 0.82% | 5.15%  |
| EDS (after electroreduction)  | 0.2%  | 0.96% | 0.19% | 0.24% | 18.73% |
| XPS (before electroreduction) | 1.27% | 6.66% | —     | 3.66% | 16.9%  |
| XPS (after electroreduction)  | 0.35% | 4.42% | —     | 2.13% | 22.76% |

Note: Atom Conc %.

## Figure caption

**Figure S1.** The EDS images for the catalyst (A), Al (B), Na (C), C (D), Si (E), O (F).

**Figure S2.** The XPS spectra of Al (A), Si (B), C (C) and O (D) in product before electroreduction and the XPS spectra of Al (E), Si (F), C (G) and O (H) in product after electroreduction.

**Figure S3.** CV of GC (A), MFI-PZ/GC (B), Ni/MFI-PZ/GC (C), Cu/MFI-PZ/GC (D) and Cu/Ni/MFI-PZ/GC (E) measured in a non-Faradaic region at scan rates from 60 to 160  $\text{mV s}^{-1}$  in 0.5 M  $\text{H}_2\text{SO}_4$ . (F) The linear relationship between scan rates and charging currents of Cu/Ni/MFI-PZ/GC (a), Cu/MFI-PZ/GC (b), Ni/MFI-PZ/GC (c), MFI-PZ/GC (d) and GC (e).

**Figure S4.** LSV of Cu/MFI-PZ/GC (A) and Ni/MFI-PZ/GC (B) were measured before and after A i-t C electroreduction at -1 V in 0.5 M  $\text{H}_2\text{SO}_4$  for the required time; (C) The relationship between activity time and overpotential of Cu/Ni/MFI-PZ/GC (a), Cu/MFI-PZ/GC (b) and Ni/MFI-PZ/GC (c); LSV plots of Ni/MFI-PZ/GC (D), Cu/MFI-PZ/GC (E) before and after stability test.

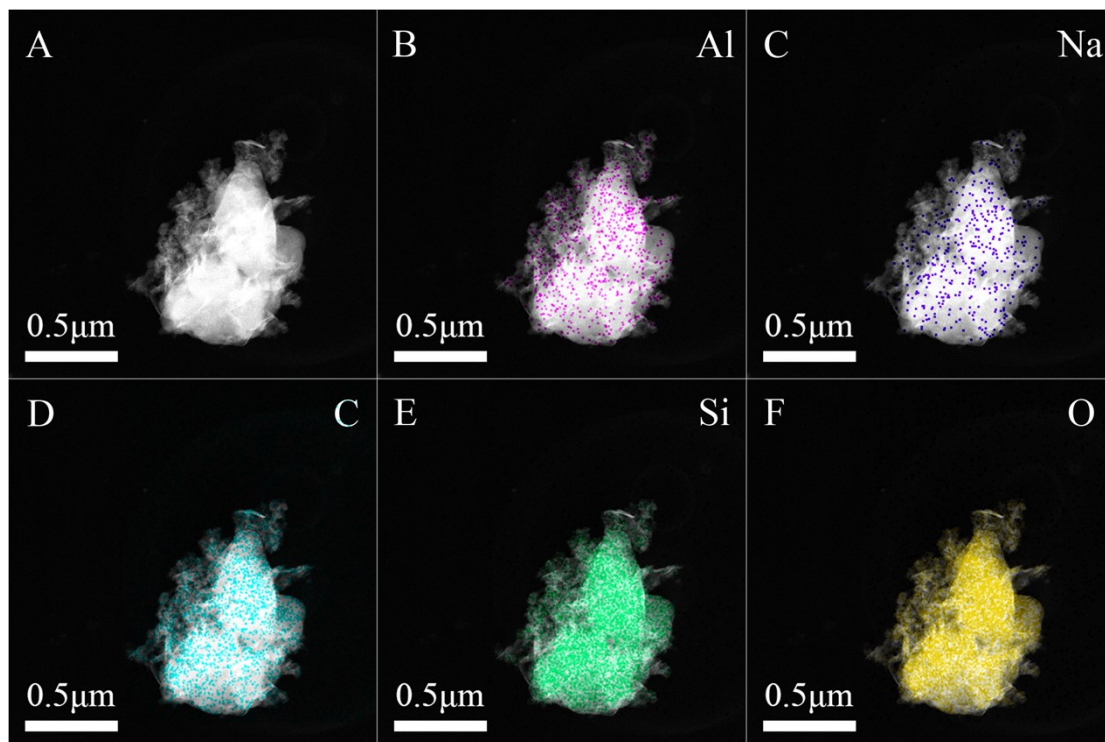

Figure S1. The EDS images for the catalyst (A), Al (B), Na (C), C (D), Si (E), O (F).

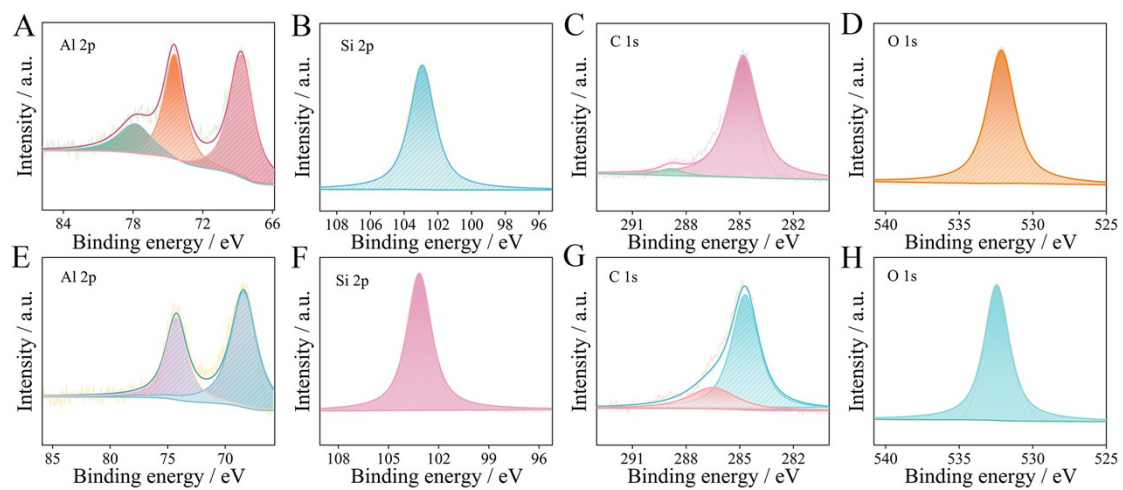

Figure S2. The XPS spectra of Al (A), Si (B), C (C) and O (D) in product before electroreduction. The XPS spectra of Al (E), Si (F), C (G) and O (H) in product after electroreduction.

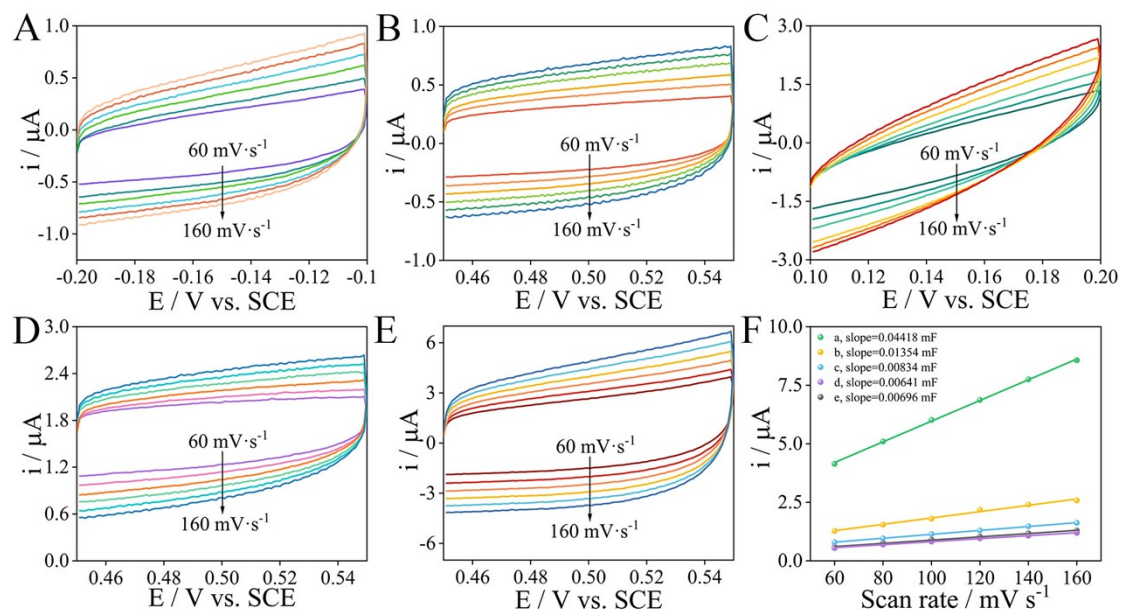

Figure S3. CV of GC (A), MFI-PZ/GC (B), Ni/MFI-PZ/GC (C), Cu/MFI-PZ/GC (D) and Cu/Ni/MFI-PZ/GC (E) measured in a non-Faradaic region at scan rates from 60 to 160  $\text{mV}\cdot\text{s}^{-1}$  in 0.5 M  $\text{H}_2\text{SO}_4$ . (F) The linear relationship between scan rates and charging currents of Cu/Ni/MFI-PZ/GC (a), Cu/MFI-PZ/GC (b), Ni/MFI-PZ/GC (c), MFI-PZ/GC (d) and GC (e).

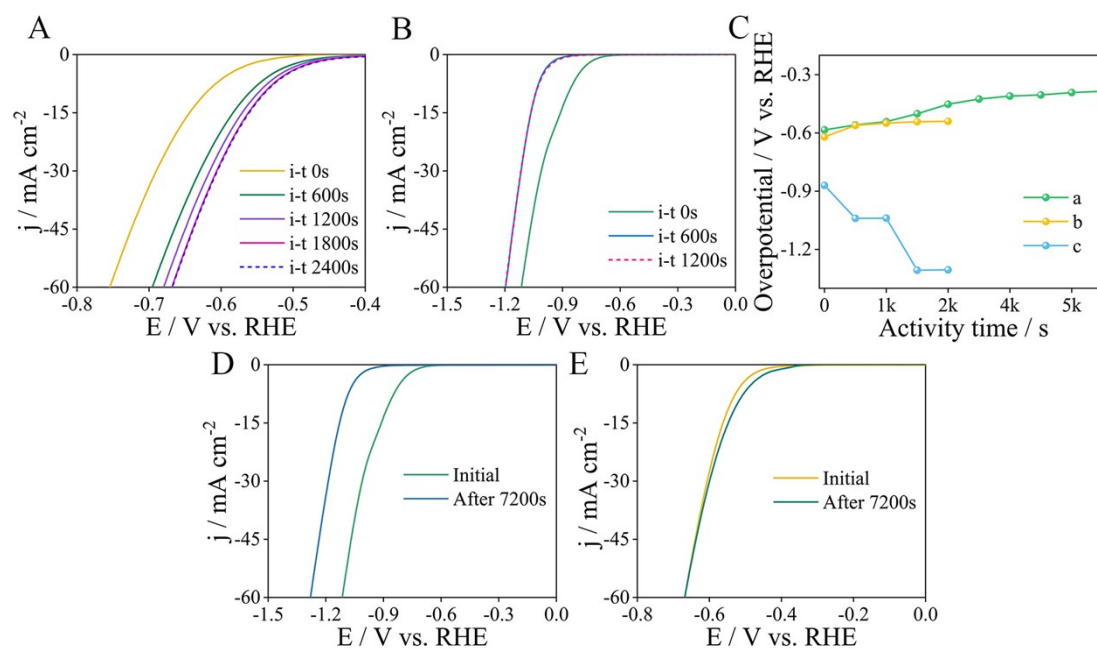

Figure S4. LSV of Cu/MFI-PZ/GC (A) and Ni/MFI-PZ/GC (B) were measured before and after A i-t C electroreduction at -1 V in 0.5 M H<sub>2</sub>SO<sub>4</sub> for the required time; (C) The relationship between activity time and overpotential of Cu/Ni/MFI-PZ/GC (a), Cu/MFI-PZ/GC (b) and Ni/MFI-PZ/GC (c); LSV plots of Ni/MFI-PZ/GC (D), Cu/MFI-PZ/GC (E) before and after stability test.
